# Supplementary material
Source: PubMed Central journal article supplement (PMC10165723)

## SUPPLEMENTAL MATERIAL

### Supplementary method

#### Appendix 1: Methods for evaluating each individual CVH metric

| CVH metric                             | Method of measurement                                                                                                                     | Quantification of CVH metric                                                        |                                                                        |
|----------------------------------------|-------------------------------------------------------------------------------------------------------------------------------------------|-------------------------------------------------------------------------------------|------------------------------------------------------------------------|
| <b>DASH diet score*</b>                |                                                                                                                                           | Points                                                                              | Metrics: DASH diet score                                               |
|                                        | Using dietary data collected from 2 nonconsecutive 24-hour recalls. The mean values of each dietary component were used in this study     | 100                                                                                 | 95th percentile (top/ideal diet)                                       |
|                                        |                                                                                                                                           | 80                                                                                  | 75th–94th percentile                                                   |
|                                        |                                                                                                                                           | 50                                                                                  | 50th–74th percentile                                                   |
|                                        |                                                                                                                                           | 25                                                                                  | 25th–49th percentile                                                   |
|                                        |                                                                                                                                           | 0                                                                                   | 1st–24th percentile (bottom/ least ideal quartile)                     |
| <b>Physical activity score</b>         |                                                                                                                                           | Points                                                                              | Metrics: minutes of moderate- (or greater) intensity activity per week |
|                                        | Self-reported minutes of moderate or vigorous physical activity per week                                                                  | 100                                                                                 | ≥150 minutes                                                           |
|                                        |                                                                                                                                           | 90                                                                                  | 120-149 minutes                                                        |
|                                        |                                                                                                                                           | 80                                                                                  | 90-119 minutes                                                         |
|                                        |                                                                                                                                           | 60                                                                                  | 60-89 minutes                                                          |
|                                        |                                                                                                                                           | 40                                                                                  | 30-59 minutes                                                          |
|                                        |                                                                                                                                           | 20                                                                                  | 1-29 minutes                                                           |
|                                        |                                                                                                                                           | 0                                                                                   | 0 minutes                                                              |
| <b>Tobacco/nicotine exposure score</b> |                                                                                                                                           | Points                                                                              | Metrics: Combustible tobacco use or secondhand smoke exposure          |
|                                        | Self-reported tobacco use or secondhand smoke exposure                                                                                    | 100                                                                                 | Never smoker                                                           |
|                                        |                                                                                                                                           | 75                                                                                  | Former smoker, quit ≥ 5 years                                          |
|                                        |                                                                                                                                           | 50                                                                                  | Former smoker, quit 1–<5 years                                         |
|                                        |                                                                                                                                           | 25                                                                                  | Former smoker, quit <1 years                                           |
|                                        |                                                                                                                                           | 0                                                                                   | Current smoker                                                         |
|                                        |                                                                                                                                           | Subtract 20 points (unless score is 0) for living with active indoor smoker in home |                                                                        |
| <b>Sleep health score</b>              |                                                                                                                                           | Points                                                                              | Metrics: Sleep hours                                                   |
|                                        | Self-reported average hours of sleep per night                                                                                            | 100                                                                                 | 7-9 hours                                                              |
|                                        |                                                                                                                                           | 90                                                                                  | 9-<10 hours                                                            |
|                                        |                                                                                                                                           | 70                                                                                  | 6-<7 hours                                                             |
|                                        |                                                                                                                                           | 40                                                                                  | 5-<6 or ≥10 hours                                                      |
|                                        |                                                                                                                                           | 20                                                                                  | 4-<5 hours                                                             |
|                                        |                                                                                                                                           | 0                                                                                   | < 4 hours                                                              |
| <b>Body mass index score</b>           |                                                                                                                                           | Points                                                                              | Metrics: BMI                                                           |
|                                        | Body mass index (BMI) was calculated as weight in kilograms divided by standing height in meters squared. Weight and standing height were | 100                                                                                 | <25 kg/m <sup>2</sup>                                                  |
|                                        |                                                                                                                                           | 70                                                                                  | 25.0-29.9 kg/m <sup>2</sup>                                            |
|                                        |                                                                                                                                           | 30                                                                                  | 30.0-34.9 kg/m <sup>2</sup>                                            |
|                                        |                                                                                                                                           | 15                                                                                  | 35.0-39.9 kg/m <sup>2</sup>                                            |
|                                        |                                                                                                                                           | 0                                                                                   | ≥ 40.0 kg/m <sup>2</sup>                                               |

|                             |                                                                                                                                                                        |                                                         |                                                             |
|-----------------------------|------------------------------------------------------------------------------------------------------------------------------------------------------------------------|---------------------------------------------------------|-------------------------------------------------------------|
|                             | measured in mobile examination centers with standard protocols.                                                                                                        |                                                         |                                                             |
| <b>Blood lipid score</b>    |                                                                                                                                                                        | Points                                                  | Metrics: Non-HDL cholesterol                                |
|                             | Non-HDL cholesterol was calculated by total cholesterol minus HDL cholesterol. Serum cholesterol was measured enzymatically                                            | 100                                                     | <130 mg/dL                                                  |
|                             |                                                                                                                                                                        | 60                                                      | 130-159 mg/dL                                               |
|                             |                                                                                                                                                                        | 40                                                      | 160-189 mg/dL                                               |
|                             |                                                                                                                                                                        | 20                                                      | 190-219 mg/dL                                               |
|                             |                                                                                                                                                                        | 0                                                       | ≥ 220 mg/dL                                                 |
|                             |                                                                                                                                                                        | If drug-treated level, subtract 20 points               |                                                             |
| <b>Glucose score</b>        |                                                                                                                                                                        | Points                                                  | Metrics: FPG or HbA1c                                       |
|                             | HbA1c was measured by high-performance liquid chromatography methods. Fasting plasma glucose (FPG) was measured by standard methods.                                   | 100                                                     | No history of diabetes and FPG <100 mg/dL (or HbA1c <5.7 %) |
|                             |                                                                                                                                                                        | 60                                                      | No diabetes and FPG 100–125 100 mg/dL (or HbA1c 5.7–6.4%)   |
|                             |                                                                                                                                                                        | 40                                                      | Diabetes with HbA1c <7.0 %                                  |
|                             |                                                                                                                                                                        | 30                                                      | Diabetes with HbA1c 7.0–7.9 %                               |
|                             |                                                                                                                                                                        | 20                                                      | Diabetes with HbA1c 8.0–8.9 %                               |
|                             |                                                                                                                                                                        | 10                                                      | Diabetes with Hb A1c 9.0–9.9 %                              |
|                             |                                                                                                                                                                        | 0                                                       | Diabetes with HbA1c ≥10.0 %                                 |
| <b>Blood pressure score</b> |                                                                                                                                                                        | Points                                                  | Metrics: Systolic and diastolic BPs                         |
|                             | The average of all available BP measurements was used to calculate systolic and diastolic BP. BPs were measured in mobile examination centers with standard protocols. | 100                                                     | <120/<80 mm Hg                                              |
|                             |                                                                                                                                                                        | 75                                                      | 120-129/<80 mm Hg                                           |
|                             |                                                                                                                                                                        | 50                                                      | 130-139 or 80-89 mm Hg                                      |
|                             |                                                                                                                                                                        | 25                                                      | 140-159 or 90-99 mm Hg                                      |
|                             |                                                                                                                                                                        | 0                                                       | ≥ 160 or ≥ 100 mm Hg                                        |
|                             |                                                                                                                                                                        | Subtract 20 points (unless score is 0) if treated level |                                                             |

\* The scoring system of DASH diet score is based on quintiles with the lowest intake receiving one point and the top quintile receiving 5 points for healthy components (vegetables, fruits, nuts and legumes, whole grains, and low-fat dairy products); The scoring for unhealthy components is reversely coded so that quintile 1 receives 5 points and quintile 5 receives one point (sugar-sweetened drinks, red and processed meats and sodium intake). The total score ranged from 8 to 40 points. Higher scores are related to greater adherence to the DASH diet pattern.

## **Appendix 2: Statistical method used for estimating the difference in life expectancy.**

We integrated information from three sources to estimate differences in life expectancies between CVH levels (henceforth “exposure groups”):

- (1) Age-specific population all-cause mortality rate derived from National Vital Statistics System of National Center for Health Statistics (NCHS) (2019, from 0 to 100 years).
- (2) The adjusted HRs of all-cause mortality in each exposure group (levels of CVH) versus the reference, derived from NHANES.
- (3) The age-specific population prevalence (categorized in 10-year age groups) of each exposure groups, derived from NHANES.

Population all-cause mortality rates were obtained from the national vital statistics reports (2019, from 0 to 100 years). Age- and sex- specific population mortality rate was used when we assessed the association of CVH with life expectancy in men and women; Age- and race/ethnicity-specific population mortality rate was used when we assessed the association of CVH with life expectancy in White, Black and Mexican participants (Since the population mortality rate for Mexican were not provided, we use the Hispanic population mortality rates instead).

We used Cox regression models to evaluate the associations between levels of CVH and risk of all-cause mortality, and/or by sex (sex-specific model) or by race (race-specific model). Several covariates were adjusted in these models, including age (20-34, 35-49, 50-64 and  $\geq 65$  years old), levels of educational attainment, family income, health insurance, and/or sex or race/ethnicity in the corresponding model. Nationally representative prevalence of each CVH groups were calculated to create lifetables.

The lifetables for each of the 3 exposure groups (CVH levels) were built based on the

estimated group- and age-specific death rate ( $IR_{aj}$ ), which was calculated by weighting (1) the population mortality rate by the corresponding (2) adjusted HR and (3) prevalence. We inferred the age-specific mortality rates appropriate for our reference group  $IR_{a0}$  as<sup>28</sup>:

$$IR_{a0} = \frac{IR_a}{(P_{a0} + \sum_{j=1}^2 P_{aj} \times HR_{aj})}$$

Where  $IR_a$  is the population mortality rate for age group  $a$ ,  $P_{aj}$  is the prevalence of exposure group  $j$ , and  $HR_{aj}$  is the adjusted hazard ratio in comparison of exposure group  $j$  versus reference group ( $j = 0$ ). The age-specific mortality rates in each of the non-reference exposure groups were then inferred in turn by multiplying the age-specific mortality rate for the reference group  $IR_{a0}$  by the hazard ratios  $HR_{aj}$ .

$$IR_{aj} = IR_{a0} \times HR_{aj} \quad (j > 0)$$

We built the life table starting at age 50 years and ending at 100 years by single-year age intervals. Survival probability was set of 1 at age 50 years; probability of survival between ages  $x$  and  $x + 1$  was calculated based on probability of dying (mortality rate) between ages  $x$  and  $x + 1$  assuming that survivor function declines linearly between ages  $x$  and  $x + 1$ .<sup>18,29</sup> The life expectancy at any given age was derived by dividing the total person-years that would be lived beyond age  $x$  by the number of persons who survived to that age interval.

Finally, the estimated higher survival time (years) due to higher CVH was calculated as the difference in the life expectancy at any given age between the reference group and each of the exposure group.

# Overview of Data Source and Method

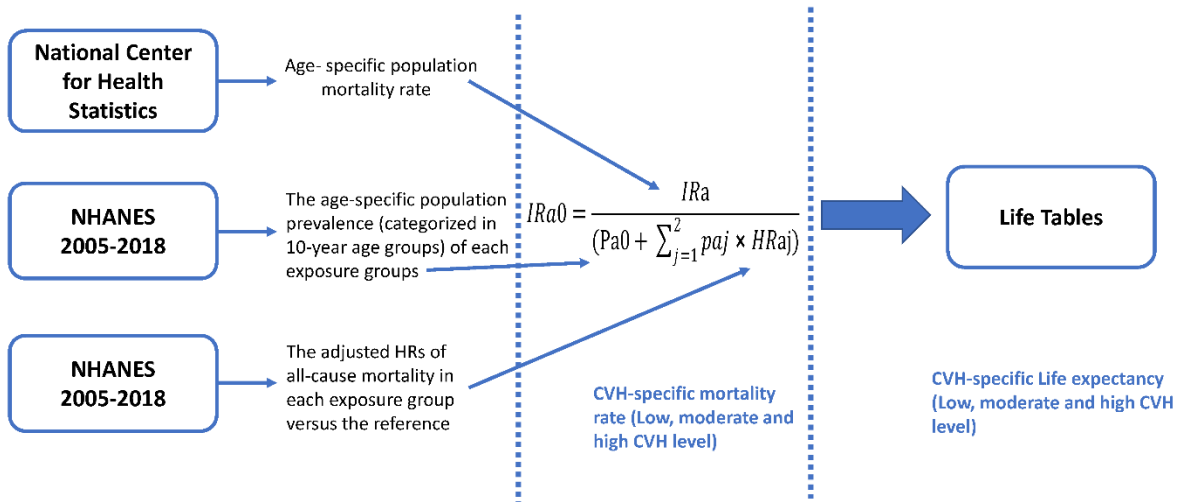

**Supplementary Table 2. Characteristics of participants at baseline by sex.**

| <b>Characteristic</b>                            | <b>Men</b>          | <b>Women</b>        |
|--------------------------------------------------|---------------------|---------------------|
| Prevalence, % (weighted N)                       | 48.2 (71.7 million) | 51.8 (77.1 million) |
| Number of participants (Sample)                  | 11,079              | 11,924              |
| Age, years (SE)                                  | 44.6 (0.26)         | 46.6 (0.26)         |
| Educational level, % (weighted N)                |                     |                     |
| Less than high school                            | 14.2 (10.2 million) | 12.8 (9.9 million)  |
| High school                                      | 23.7 (17.0 million) | 21.8 (16.8 million) |
| Some college or above                            | 62.1 (44.5 million) | 65.4 (50.4 million) |
| Family Income, % (weighted N)                    |                     |                     |
| Low                                              | 16.5 (11.8 million) | 19.0 (14.6 million) |
| Intermediate                                     | 32.3 (23.2 million) | 33.0 (25.4 million) |
| High                                             | 45.2 (32.4 million) | 42.0 (32.4 million) |
| Insurance, % (weighted N)                        |                     |                     |
| No insurance                                     | 20.1 (14.4 million) | 15.5 (12.0 million) |
| Government insurance                             | 13.8 (9.9 million)  | 17.0 (13.1 million) |
| Private insurance                                | 66.0 (47.3 million) | 67.2 (51.8 million) |
| <b>AHA Life's Essential 8 Scores, (Mean, SE)</b> |                     |                     |
| <b>Mean Total CVH Score (SE)</b>                 | 65.7 (0.30)         | 68.9 (0.32)         |
| Mean DASH diet score (SE)                        | 40.4 (0.51)         | 51.8 (0.51)         |
| Mean physical activity score (SE)                | 55.5 (0.83)         | 50.9 (0.89)         |
| Mean tobacco/nicotine exposure score (SE)        | 66.6 (0.62)         | 73.8 (0.53)         |
| Mean sleep health score (SE)                     | 83.4 (0.34)         | 84.3 (0.34)         |
| Mean body mass index score (SE)                  | 60.9 (0.50)         | 60.9 (0.56)         |
| Mean blood lipid score (SE)                      | 62.0 (0.43)         | 66.8 (0.46)         |
| Mean blood glucose score (SE)                    | 87.1 (0.31)         | 87.8 (0.28)         |
| Mean blood pressure score (SE)                   | 69.7 (0.46)         | 74.8 (0.37)         |

Data are mean (SE) or percentages (weight N). SE, standard error; DASH diet, the Dietary Approaches to Stop Hypertension (DASH) diet score

**Supplementary Table 3. Characteristics of participants at baseline by race groups.**

| <b>Characteristic</b>                            | <b>White</b>        | <b>Black</b>        | <b>Mexican</b>     | <b>Other Hispanic</b> | <b>Others</b>      |
|--------------------------------------------------|---------------------|---------------------|--------------------|-----------------------|--------------------|
| Prevalence, % (weighted N)                       | 68.8 (102 million)  | 10.4 (15.5 million) | 8.3 (12.4 million) | 5.5 (8.2 million)     | 6.9 (10.3 million) |
| Number of participants (Sample)                  | 9,697               | 4,881               | 3,729              | 2,273                 | 2,423              |
| Age, years (SE)                                  | 47.4 (0.28)         | 43.4 (0.33)         | 39.9 (0.30)        | 41.7 (0.40)           | 42.0 (0.40)        |
| Educational level, % (weighted N)                |                     |                     |                    |                       |                    |
| Less than high school                            | 8.6 (8.8 million)   | 17.2 (2.7 million)  | 43.7 (5.4 million) | 29.0 (2.4 million)    | 8.5 (0.9 million)  |
| High school                                      | 22.8 (23.4 million) | 26.8 (4.2 million)  | 22.9 (2.8 million) | 22.0 (1.8 million)    | 15.5 (1.6 million) |
| Some college or above                            | 68.6 (70.3 million) | 56.0 (8.7 million)  | 33.3 (4.1 million) | 48.9 (4.0 million)    | 75.9 (7.8 million) |
| Family Income, % (weighted N)                    |                     |                     |                    |                       |                    |
| Low                                              | 12.7 (13.0 million) | 28.8 (4.5 million)  | 37.7 (4.7 million) | 30.7 (2.5 million)    | 17.8 (1.8 million) |
| Intermediate                                     | 31.1 (31.9 million) | 37.7 (5.8 million)  | 36.4 (4.5 million) | 35.7 (2.9 million)    | 34.1 (3.5 million) |
| High                                             | 51.6 (52.9 million) | 24.8 (3.9 million)  | 16.7 (2.1 million) | 22.5 (1.8 million)    | 41.1 (4.2 million) |
| Insurance, % (weighted N)                        |                     |                     |                    |                       |                    |
| No insurance                                     | 12.2 (12.5 million) | 24.4 (3.8 million)  | 46.3 (5.7 million) | 31.6 (2.6 million)    | 16.5 (1.7 million) |
| Government insurance                             | 13.3 (13.7 million) | 25.0 (3.9 million)  | 14.5 (1.8 million) | 21.5 (1.8 million)    | 18.6 (1.9 million) |
| Private insurance                                | 74.3 (76.1 million) | 50.2 (7.8 million)  | 38.6 (4.8 million) | 46.5 (3.8 million)    | 64.5 (6.7 million) |
| <b>AHA Life's Essential 8 Scores, (Mean, SE)</b> |                     |                     |                    |                       |                    |
| <b>Mean Total CVH Score (SE)</b>                 | 68.0 (0.4)          | 62.4 (0.3)          | 66.1 (0.3)         | 66.9 (0.5)            | 70.5 (0.5)         |
| Mean DASH diet score (SE)                        | 47.3 (0.6)          | 37.6 (0.8)          | 46.3 (0.8)         | 45.7 (1.0)            | 50.5 (1.0)         |
| Mean physical activity score (SE)                | 55.7 (1.0)          | 47.6 (1.0)          | 41.8 (1.0)         | 46.8 (1.4)            | 54.8 (1.3)         |
| Mean tobacco/nicotine exposure score (SE)        | 69.1 (0.7)          | 68.7 (0.8)          | 75.4 (0.8)         | 75.6 (1.0)            | 75.4 (1.3)         |
| Mean sleep health score (SE)                     | 85.5 (0.4)          | 74.2 (0.5)          | 83.8 (0.5)         | 80.6 (0.7)            | 84.3 (0.6)         |
| Mean body mass index score (SE)                  | 61.9 (0.5)          | 52.3 (0.6)          | 55.0 (0.8)         | 60.3 (0.8)            | 71.1 (1.1)         |
| Mean blood lipid score (SE)                      | 63.5 (0.4)          | 71.3 (0.5)          | 64.1 (0.7)         | 63.5 (0.9)            | 66.2 (0.9)         |
| Mean blood glucose score (SE)                    | 88.9 (0.3)          | 81.6 (0.5)          | 85.1 (0.6)         | 86.0 (0.5)            | 86.1 (0.7)         |
| Mean blood pressure score (SE)                   | 72.1 (0.4)          | 65.7 (0.6)          | 77.6 (0.5)         | 76.4 (0.8)            | 76.0 (0.7)         |

Data are mean (SE) or percentages (weight N). SE, standard error; DASH diet, the Dietary Approaches to Stop Hypertension (DASH) diet score.

**Supplementary Table 4. Hazard ratios and 95% confidence interval for category of LE8 with the hazard of mortality (multiple imputation was used to impute data for missing covariates)**

|                         | All-cause    |                  | CVD mortality |                  | Non-CVD mortality |                  |
|-------------------------|--------------|------------------|---------------|------------------|-------------------|------------------|
|                         | Cases/Total* | HRs (95% CI) †   | Cases/Total*  | HRs (95% CI) †   | Cases/Total*      | HRs (95% CI) †   |
| <b><i>CVH score</i></b> |              |                  |               |                  |                   |                  |
| Low (LE8<50)            | 422/3,704    | 1 (reference)    | 120/3704      | 1 (reference)    | 302/3704          | 1 (reference)    |
| Moderate (50-79)        | 834/14,977   | 0.55 (0.46-0.66) | 192/14977     | 0.41 (0.30-0.55) | 642/14977         | 0.62 (0.50-0.75) |
| High (≥80)              | 103/4,322    | 0.38 (0.28-0.52) | 16/4322       | 0.23 (0.11-0.46) | 87/4322           | 0.44 (0.33-0.60) |

Results adjusted for sex, age, race/ethnicity, education, family income and health insurance. \*: unweighted number of participants; †: sampling weights were considered in analyses;



**Supplementary Table 5. Hazard ratios and 95% confidence interval for category of LE8 with the hazard of mortality in men and women**

|                                          | All-cause     |                  | CVD mortality |                  | Non-CVD mortality |                  |
|------------------------------------------|---------------|------------------|---------------|------------------|-------------------|------------------|
|                                          | Cases/Total * | HRs (95% CI) †   | Cases/Total * | HRs (95% CI) †   | Cases/Total *     | HRs (95% CI) †   |
| <b>Men</b>                               |               |                  |               |                  |                   |                  |
| Low (LE8<50)                             | 231/1,932     | 1 (reference)    | 63/1932       | 1 (reference)    | 168/1932          | 1 (reference)    |
| Moderate (50-79)                         | 488/7,463     | 0.54 (0.42-0.69) | 112/7463      | 0.38 (0.25-0.58) | 376/7463          | 0.61 (0.45-0.81) |
| High ( $\geq$ 80)                        | 53/1,684      | 0.43 (0.29-0.63) | 13/1684       | 0.36 (0.17-0.79) | 41/1684           | 0.46 (0.30-0.71) |
| <b>Women</b>                             |               |                  |               |                  |                   |                  |
| Low (LE8<50)                             | 191/1,772     | 1 (reference)    | 57/1772       | 1 (reference)    | 134/1772          | 1 (reference)    |
| Moderate (50-79)                         | 346/7,514     | 0.58 (0.46-0.75) | 80/7514       | 0.47 (0.32-0.68) | 266/7514          | 0.63 (0.47-0.85) |
| High ( $\geq$ 80)                        | 50/2,638      | 0.35 (0.20-0.61) | 4/2638        | 0.11 (0.04-0.33) | 46/2638           | 0.43 (0.25-0.75) |
| <b>P-interaction<br/>(Men vs. women)</b> |               | 0.62             |               | 0.09             |                   | 0.94             |

Results adjusted for age, race/ethnicity, education, family income and health insurance. \*: unweighted number of participants; †: sampling weights were considered in analyses.

**Supplementary Table 6. Hazard ratios and 95% confidence interval for category of LE8 with the hazard of all-cause mortality race/ethnicity groups**

|                   | All-cause mortality |                  |
|-------------------|---------------------|------------------|
|                   | Cases/Total*        | HRs (95% CI) †   |
| <b>White</b>      |                     |                  |
| Low (LE8<50)      | 205/1,492           | 1 (reference)    |
| Moderate (50-79)  | 478/6,141           | 0.55 (0.44-0.69) |
| High ( $\geq$ 80) | 64/2,064            | 0.36 (0.25-0.52) |
| <b>Black</b>      |                     |                  |
| Low (LE8<50)      | 143/1,097           | 1 (reference)    |
| Moderate (50-79)  | 183/3,251           | 0.68 (0.55-0.85) |
| High ( $\geq$ 80) | 11/5,33             | 0.38 (0.20-0.71) |
| <b>Mexican</b>    |                     |                  |
| Low (LE8<50)      | 37/563              | 1 (reference)    |
| Moderate (50-79)  | 87/2,583            | 0.65 (0.40-1.07) |
| High ( $\geq$ 80) | 15/583              | 1.53 (0.68-3.44) |

Results adjusted for sex, age, education, family income and health insurance. \*: unweighted number of participants; †: sampling weights were considered in analyses.

*P*-interaction (White vs. Black) =0.46; *P*-interaction (White vs. Mexican) =0.005; *P*-interaction (Black vs. Mexican) =0.026.

**Supplementary Table 7. The estimates of cumulative survival time at the of 50 among participants with different levels of LE8 score**

|                                                                       | <b>Total Population</b> |                                  |                                                                           |
|-----------------------------------------------------------------------|-------------------------|----------------------------------|---------------------------------------------------------------------------|
|                                                                       | <b>HRs<br/>(95% CI)</b> | <b>LE at age 50<br/>(95% CI)</b> | <b><i>Years of life gain</i><br/>between adjacent groups<br/>(95% CI)</b> |
| <b><i>LE8 Score</i></b>                                               |                         |                                  |                                                                           |
| Low (<50)                                                             | 1 (reference)           | 27.1 (25.9, 28.2)                |                                                                           |
| 50-<60                                                                | 0.74 (0.62, 0.89)       | 29.9 (28.8, 30.9)                | 2.8 (1.0, 4.6)                                                            |
| 60-<70                                                                | 0.50 (0.40, 0.62)       | 33.7 (32.4, 34.9)                | 3.8 (1.8, 5.7)                                                            |
| 70-<80                                                                | 0.39 (0.30, 0.50)       | 36.1 (34.4, 37.6)                | 2.4 (0.2, 4.6)                                                            |
| 80-<90                                                                | 0.39 (0.28, 0.54)       | 35.9 (33.6, 38.1)                | -0.2 (-3.0, 2.7)                                                          |
| 90-100                                                                | 0.31 (0.17, 0.56)       | 38.0 (32.4, 42.7)                | 2.1 (3.4, 6.9)                                                            |
| <b>Mean increase in LE per 10-point increase compared to poor CVH</b> |                         |                                  | <b>2.2 (1.0, 3.2)</b>                                                     |

HRs were adjusted for sex, race/ethnicity, age, education, health insurance, family income.

**Supplementary Table 8. The estimates of cumulative survival time at the of 50 among participants with different levels of individual CVH metrics**

|                                               | Total population  |                          |                                |
|-----------------------------------------------|-------------------|--------------------------|--------------------------------|
|                                               | HRs<br>(95% CI)   | LE at age 50<br>(95% CI) | Years of life gain<br>(95% CI) |
| <b><i>DASH diet score</i></b>                 |                   |                          |                                |
| Poor (<50)                                    | 1 (reference)     | 30.5 (29.5, 31.4)        | reference                      |
| Intermediate (50-79)                          | 0.90 (0.76-1.07)  | 31.5 (30.5, 32.4)        | 0.9 (-0.7, 2.7)                |
| Ideal (≥80)                                   | 0.70 (0.58-0.85)  | 33.8 (32.8, 34.9)        | 3.3 (1.6, 5.1)                 |
| <b><i>Physical activity score</i></b>         |                   |                          |                                |
| Poor (<50)                                    | 1 (reference)     | 30.2 (29.7, 30.7)        | reference                      |
| Intermediate (50-79)                          | 0.60 (0.43, 0.83) | 35.0 (31.6, 37.8)        | 4.8 (1.3, 7.7)                 |
| Ideal (≥80)                                   | 0.61 (0.51, 0.74) | 34.8 (33.8, 35.8)        | 4.6 (3.1, 6.1)                 |
| <b><i>Tobacco/nicotine exposure score</i></b> |                   |                          |                                |
| Poor (<50)                                    | 1 (reference)     | 26.8 (25.5, 27.9)        | reference                      |
| Intermediate (50-79)                          | 0.59 (0.49, 0.72) | 31.7 (30.8, 32.6)        | 4.9 (3.2, 6.8)                 |
| Ideal (≥80)                                   | 0.45 (0.38, 0.54) | 34.2 (33.3, 35.0)        | 7.4 (5.7, 9.1)                 |
| <b><i>Sleep health score</i></b>              |                   |                          |                                |
| Poor (<50)                                    | 1 (reference)     | 28.1 (26.8, 29.4)        | reference                      |
| Intermediate (50-79)                          | 0.68 (0.56, 0.84) | 31.6 (30.3, 32.9)        | 3.5 (1.6, 5.5)                 |
| Ideal (≥80)                                   | 0.59 (0.48, 0.72) | 33.0 (32.5, 33.5)        | 5.0 (3.2, 6.7)                 |
| <b><i>Body mass index score</i></b>           |                   |                          |                                |
| Poor (<50)                                    | 1 (reference)     | 31.2 (30.4, 32.1)        | reference                      |
| Intermediate (50-79)                          | 0.78 (0.65, 0.93) | 33.6 (32.5, 34.5)        | 2.3 (0.6, 3.8)                 |
| Ideal (≥80)                                   | 1.00 (0.85, 1.18) | 31.3 (30.2, 32.3)        | 0.0 (-1.1, 1.1)                |
| <b><i>Blood lipid score</i></b>               |                   |                          |                                |
| Poor (<50)                                    | 1 (reference)     | 32.7 (31.8, 33.6)        | reference                      |
| Intermediate (50-79)                          | 0.89 (0.72, 1.10) | 33.9 (32.4, 35.0)        | 1.2 (-0.6, 2.7)                |
| Ideal (≥80)                                   | 1.24 (1.06, 1.45) | 30.6 (29.9, 31.4)        | -2.0 (-3.6, -0.5)              |
| <b><i>Glucose score</i></b>                   |                   |                          |                                |
| Poor (<50)                                    | 1 (reference)     | 28.1 (26.8, 29.3)        | reference                      |
| Intermediate (50-79)                          | 0.60 (0.48, 0.75) | 33.0 (31.8, 34.1)        | 4.8 (2.9, 6.9)                 |
| Ideal (≥80)                                   | 0.60 (0.50, 0.71) | 33.1 (32.3, 33.8)        | 4.9 (3.2, 6.8)                 |
| <b><i>Blood pressure score</i></b>            |                   |                          |                                |
| Poor (<50)                                    | 1 (reference)     | 30.2 (29.4, 31.1)        | reference                      |
| Intermediate (50-79)                          | 0.73 (0.64, 0.84) | 33.2 (32.3, 34.2)        | 3.0 (1.3, 4.6)                 |
| Ideal (≥80)                                   | 0.72 (0.61, 0.85) | 33.4 (32.1, 34.4)        | 3.1 (1.3, 4.7)                 |

Results were adjusted for sex, race/ethnicity, age, education, health insurance, family income.

**Supplementary Figure 1. Observed and predicted rate of US population mortality rates of 2019.**

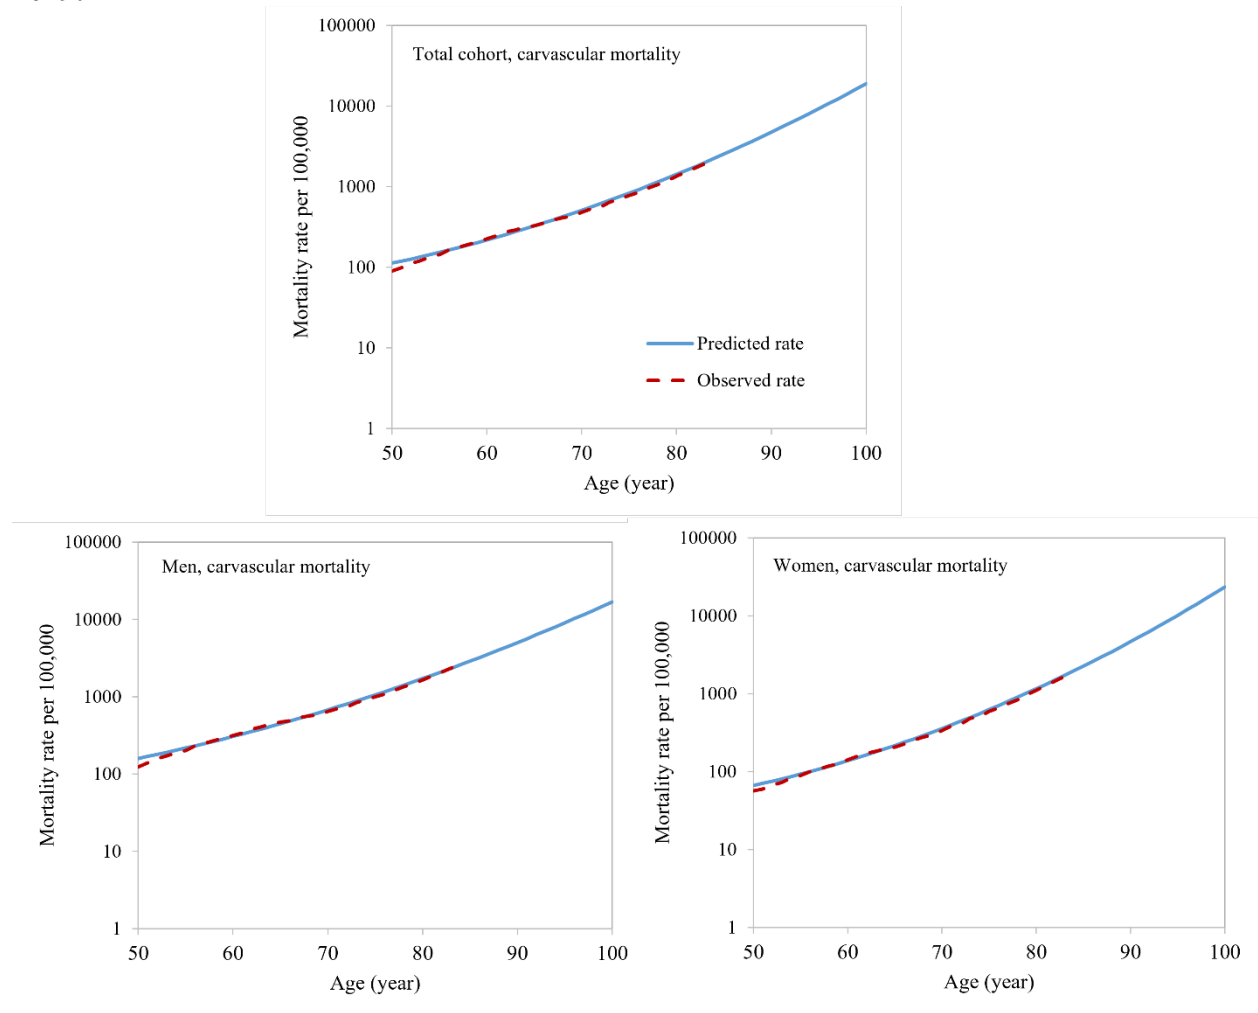

Rate was predicted by Poisson model log-linear age + age<sup>2</sup>.

**Supplementary Figure 2. Estimated years of life gained from high versus low CVH attributable to reduced death from cardiovascular disease and other causes in White participants.**

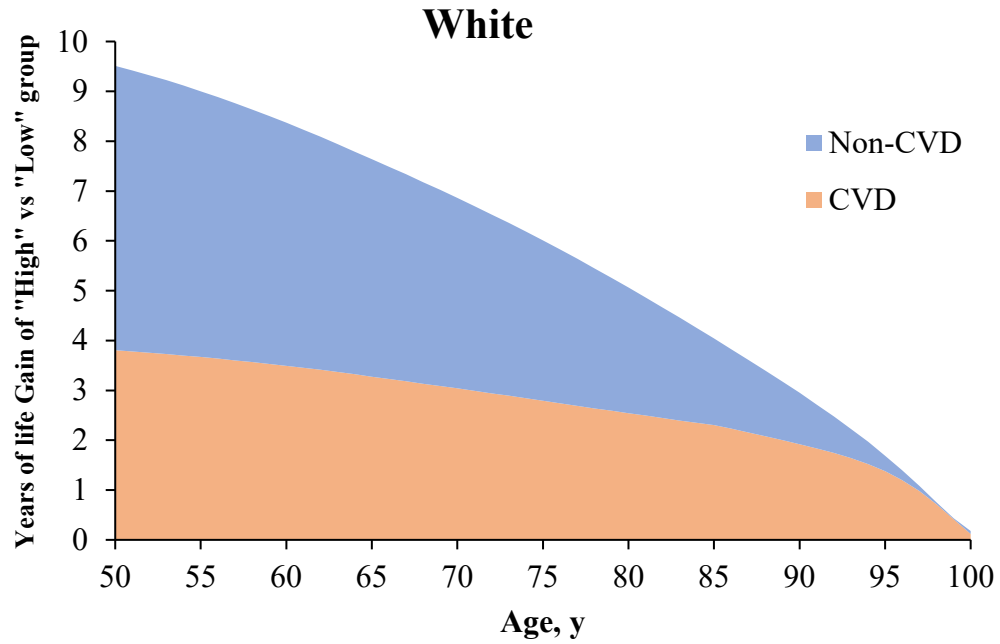

CVH, cardiovascular health; CVD, cardiovascular disease

Supplementary Figure 3. The estimates of cumulative survival time from 50 years of age onward among participants with different levels of CVH, estimated by the LE8 score, in Mexican participants.

## Supplementary Figure 3

### Mexican

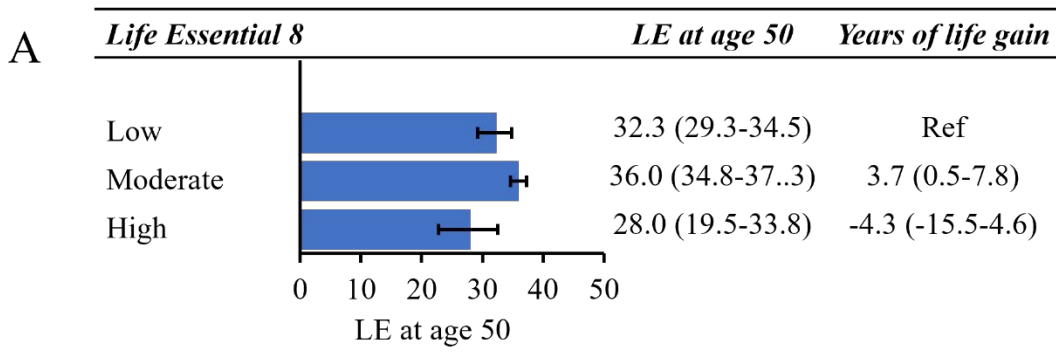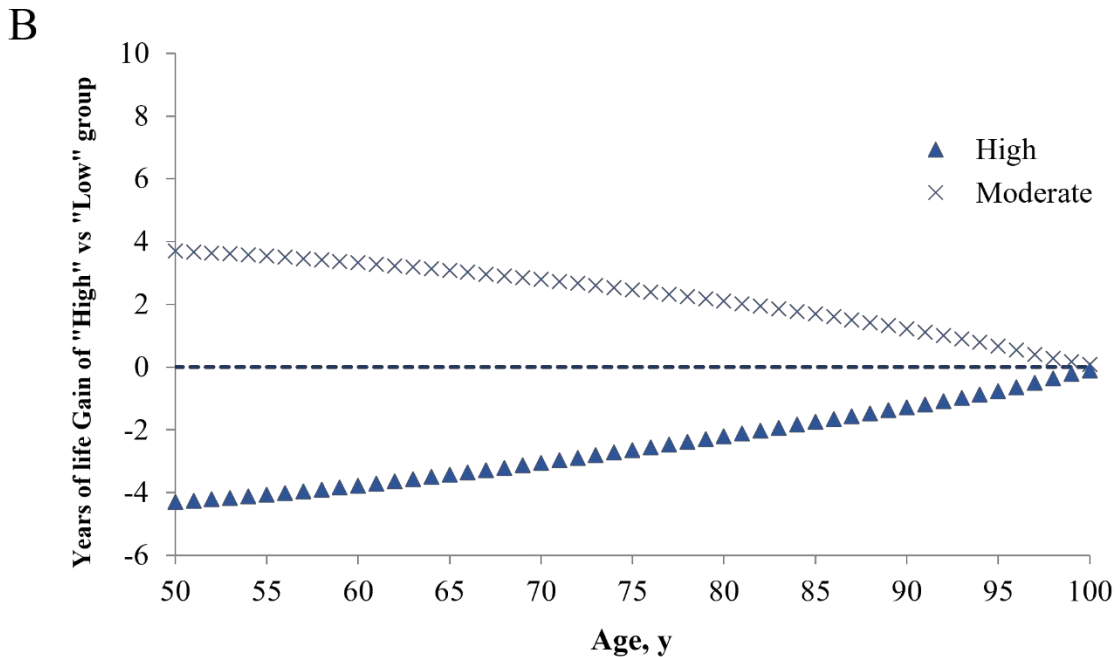

Supplement: NIHMS1877921-supplement-Supplemental_Publication_Material.pdf [file NIHMS1877921-supplement-Supplemental_Publication_Material.pdf]
